# Supplementary material for: First characterization of the probiotic potential of lactic acid bacteria isolated from Costa Rican pineapple silages
Source: PeerJ. 2021 Nov 30;9:e12437. doi: 10.7717/peerj.12437 (PMC8641478; doi:10.7717/peerj.12437)
Supplement: Supplemental Information 9 [file peerj-09-12437-s009.xls]

## Sheet: Explanation
Assays of Resistance to the Gastrointestinal Tract Tolerance to pH 2.0 (pH2 raw data), bile (raw data), lysozyme (raw data) (Table 2)

## Sheet: ph2 raw data
6702 Lactobacillus fermentum							6714 Lactobacillus paracasei							6706 Weisella ghanensis							6709 Lactobacillus paracasei								6717 Lactobacillus parafarraginis
Time	Sample	Count	LogUFC/ mL				Time	Sample	Count	LogUFC/ mL				Time	Sample	Count	LogUFC/ mL				Time	Sample	Count	LogUFC/ mL					Time	Sample	Count	LogUFC/ mL
0	Control	7100000	6.85126				0	Control	430000	5.63347				0	Control	400000	5.60206				0	Control	4400000	6.64345					0	Control	4900000	6.6902
	1	2900000	6.4624					1	450000	5.65321					1	390000	5.59106					1	3600000	6.5563						1	4700000	6.6721
	2	2900000	6.4624					2	450000	5.65321					2	510000	5.70757					2	3100000	6.49136						2	4600000	6.66276
	3	3200000	6.50515					3	560000	5.74819					3	410000	5.61278					3	4100000	6.61278						3	4700000	6.6721
	Mean	3000000	6.47712					Mean	486667	5.68723					Mean	436667	5.64015					Mean	3600000	6.5563						Mean	4.66667e+06	6.66901
	Standard deviation		0.0246829					Standard deviation		0.0548341					Standard deviation		0.0619539					Standard deviation		0.0607602						Standard deviation		0.00539247
Time	Sample	Count	LogUFC/ mL	Survival			Time	Sample	Count	LogUFC/ mL	Survival			Time	Sample	Count	LogUFC/ mL	Survival			Time	Sample	Count	LogUFC/ mL					Time	Sample	Count	LogUFC/ mL	Survival
3	Control	7200000	6.85733				3	Control	830000	5.91908				3	Control	300000	5.47712				3	Control	6900000	6.83885					3	Control	6200000	6.79239
	1	900000	5.95424	92.1367				1	39000	4.59106	81.2116				1	16000	4.20412	75.1936				1	930	2.96848	45.2768					1	580000	5.76343	86.381
	2	1000000	6	92.8448				2	29000	4.4624	78.9356				2	29000	4.4624	78.1838				2	830	2.91908	44.9687					2	590000	5.77085	86.6136
	3	910000	5.95904	91.605				3	39000	4.59106	79.8698				3	28000	4.44716	79.2327				3	900	2.95424	44.6747					3	580000	5.76343	86.381
	Mean	936667	5.97159	92.1955				Mean	35666.7	4.55226	80.0057				Mean	24333.3	4.3862	77.5367				Mean	886.667	2.94776	44.9734					Mean	583333	5.7659	86.4586
	Mean survival	0.505536						Mean survival	1.13497						Mean survival	1.25395						Mean survival	3.60854							Mean survival	0.903104
	%mean survival	92.195						%mean survival	80.0436						%mean survival	77.7675						%mean survival	44.9607							%mean survival	86.4582
	%Control Survival	100.089						%Control Survival	105.07						%Control Survival	97.7698						%Control Survival	102.941							%Control Survival	101.528
	Standard deviation		0.0251475	0.621991				Standard deviation		0.0742857	1.14406				Standard deviation		0.144918	2.09588				Standard deviation		0.0254302	0.301061					Standard deviation		0.00428626	0.134244
																													6719 Lactobacillus parafarraginis
6710 Lactobacillus paracasei							6711 Lactobacillus paracasei							6715 Lactobacillus paracasei							6704Lactobacillus fermentum								Time	Sample	Count	LogUFC/ mL
Time	Sample	Count	LogUFC/ mL				Time	Sample	Count	LogUFC/ mL				Time	Sample	Count	LogUFC/ mL				Time	Sample	Count	LogUFC/ mL					0	Control	43000000	7.63347
0	Control	3000000	6.47712				0	Control	18000000	7.25527				0	Control	1500000	6.17609				0	Control	5000000	6.69897						1	44000000	7.64345
	1	3000000	6.47712					1	80000000	7.90309					1	940000	5.97313					1	4100000	6.61278						2	44000000	7.64345
	2	3700000	6.5682					2	44000000	7.64345					2	1100000	6.04139					2	3700000	6.5682						3	43000000	7.63347
	3	4500000	6.65321					3	4500000	6.65321					3	800000	5.90309					3	3800000	6.57978						Mean	4.36667e+07	7.64015
	Mean	3.73333e+06	6.5721					Mean	4.28333e+07	7.63178					Mean	946667	5.9762					Mean	3.86667e+06	6.58734						Standard deviation		0.00576439
	Standard deviation		0.0880631					Standard deviation	0.659568						Standard deviation	0.0691532						Standard deviation		0.0231327
																					Time	Sample	Count	LogUFC/ mL	Survival				Time	Sample	Count	LogUFC/ mL	Survival
Time	Sample	Count	LogUFC/ mL	Survival			Time	Sample	Count	LogUFC/ mL	Survival			Time	Sample	Count	LogUFC/ mL	Survival			3	Control	8000000	6.90309					3	Control	50000000	7.69897
3	Control	9700000	6.98677				3	Control	50000000	7.69897				3	Control	11000000	7.04139					1	850000	5.92942	89.666					1	42000000	7.62325	99.7357
	1	1900000	6.27875	96.9374				1	3500000	6.54407	82.8039				1	280000	5.44716	91.1944				2	930000	5.96848	90.8694					2	41000000	7.61278	99.5988
	2	2100000	6.32222	96.255				2	3100000	6.49136	84.9271				2	510000	5.70757	94.4744				3	780000	5.89209	89.5485					3	42000000	7.62325	99.8661
	3	1700000	6.23045	93.6457				3	2600000	6.41497	96.4192				3	420000	5.62325	95.2594				Mean	853333	5.93112	90.0279					Mean	4.16667e+07	7.61976	99.7335
	Mean	1900000	6.27875	95.6127				Mean	3.06667e+06	6.48667	88.0501				Mean	403333	5.60566	93.6427				Mean survival	0.656218							Mean survival	0.0203892
	Mean survival	0.293343						Mean survival	1.14512						Mean survival	0.370533						%mean survival	90.0382							%mean survival	99.7331
	%mean survival	95.5365						%mean survival	84.9954						%mean survival	93.7999						%Control Survival	103.047							%Control Survival	100.858
	%Control Survival	107.868						%Control Survival	106.116						%Control Survival	114.011						Standard deviation		0.0381975	0.731059					Standard deviation		0.00604222	0.133698
	Standard deviation		0.0459064	1.73729				Standard deviation		0.0649084	7.3252				Standard deviation		0.132874	2.15635
							6712 Lactobacillus paracasei
6713 Lactobacillus paracasei							Time	Sample	Count	LogUFC/ mL
Time	Sample	Count	LogUFC/ mL				0	Control	1100000	6.04139
0	Control	900000	5.95424					1	6200000	6.79239
	1	980000	5.99123					2	6300000	6.79934
	2	970000	5.98677					3	6100000	6.78533
	3	990000	5.99564					Mean	6200000	6.79239
	Mean	980000	5.99123					Standard deviation		0.00700543
	Standard deviation		0.00443175
							Time	Sample	Count	LogUFC/ mL	Survival
							3	Control	6700000	6.82607
Time	Sample	Count	LogUFC/ mL	Survival				1	550000	5.74036	84.5117
3	Control	1500000	6.17609					2	500000	5.69897	83.8165
	1	180000	5.25527	87.7161				3	500000	5.69897	83.9896
	2	190000	5.27875	88.1736				Mean	516667	5.71321	84.1059
	3	190000	5.27875	88.0433				Mean survival	1.07918
	Mean	186667	5.27107	87.9777				%mean survival	84.1119
	Mean survival	0.720159						%Control Survival	112.988
	%mean survival	87.9798						Standard deviation		0.0238981	0.36188
	%Control Survival	103.726
	Standard deviation		0.0135568	0.235688
RESULTS
Sample	Strain	Count		Survival (Final/inicial )*100
		0 hours	3 hours
6702	L.fermentum	6,48±0,02	5,97±0,02	92.195
6710	L.paracasei	6,57±0,09	6,27±0,04	95.5365
6714	L.paracasei	5,68±0,05	4,55±0,07	80.0436
6713	L.paracasei	5,991±0,004	5,27±0,01	87.9798
6711	L.paracasei	7,63±0,6	6,48±0,06	84.9954
6706	Weiseella ghanensis	436667	24333.3	77.5019
	Sample		Count (logUFC/mL)		Survival
pH Value			0 hours	3 hours
2	6702	L.fermentum	6.47712	5,97±0,02	92.195
	6710	L.paracasei	6.5721	6,27±0,04	95.5365
	6714	L.paracasei	5,68±0,05	4,55±0,07	80.0436
	6713	L.paracasei	5,991±0,004	5,27±0,01	87.9798
	6711	L.paracasei	7,63±0,6	6,48±0,06	84.9954
	6706	Weiseella ghanensis	436667	23666.7	77.5536
		6712	6200000	516667	84.1059
		6709	3600000	886.667	44.9734
		6715	946667	403333	93.6427
		6704	3.86667e+06	853333	90.0279
	6702	L.fermentum	6,85±0,02	6,86±0,02	100.089
	6710	L.paracasei	6,48±0,03	6,96±0,03	105.7
6	6714	L.paracasei	5,63±0,04	5,92±0,04	107.868
	6713	L.paracasei	5,95±0,05	6,18±0,05	103.726
	6711	L.paracasei	7,26±0,06	7,69±0,06	106.116
	6706	Weiseella ghanensis	400000	300000	97.7698
	Sample		Count (logUFC/mL)		Survival
			0 hours	3 hours
	6702	Lactobacillus fermentum_6702	6.47712	5.97159	92.195
	6710	Lactobacillus paracasei_6710	6.5721	6.27875	95.5365
	6714	Lactobacillus paracasei._6714	5.68723	4.55226	80.0436
	6713	Lactobacillus paracasei._6713	5.99123	5.27107	87.9798
	6711	Lactobacillus paracasei._6711	7.63178	6.48667	84.9954
	6706	Weissella sp. _6706	5.64015	4.37123	77.5536
	6712	Lactobacillus paracasei._6712	6.79239	5.71321	84.1119
	6715	Lactobacillus paracasei_6715	5.9762	5.60566	93.7999
	6704	Lactobacillus fermentum 6704	6.58734	5.93112	90.0382
	6709	Lactobacillus paracasei_6709	6.5563	2.94776	44.9607
	6717	Lactobacillus parafarraginis_ 6717	6.66901	5.7659	86.4586
	6719	Lactobacillus parafarraginis_ 6719	7.64015	7.61976	99.7335
	Sample		Count (logUFC/mL)		Survival
			0 hours	3 hours
	6702	Lactobacillus fermentum	6,48±0,02	5,97±0,03	92,2±0,6
	6710	Lactobacillus sp.	6,57±0,08	6,28±0,06	95,5±1,7
	6714	Lactobacillus sp.	5,69±0,05	4,55±0,07	80,0±1,1
	6713	Lactobacillus sp.	5,99±0,004	5,27±0,01	88,0±0,2
	6711	Lactobacillus sp.	7,63±0,66	6,49±0,06	85.0±7.3
	6707	L.spicheri	6,59±0,06	4,64±0,03	70,3±0,7
	6706	Weissella fabaria	5,64±0,06	4,37±0,14	77,6±2,1
	6705	Fructobacillus tropaeoli	6,90±0,02	6,61±0,03	95,8±0,4
	6704	Lactobacillus sp.	6,79±0,01	5,71±0,02	84,1±0,4
	6709	Lactobacillus sp.	5,98±0,07	5,61±0,1	93,8±2,1
	6717	Lactobacillus fermentum	6,59±0,02	5,93±0,04	90,0±0,7
	6719	Lactobacillus parafarraginis	6,69±0,005	5,76±0,004	86,4±0,1

## Sheet: resume
Sample		Count (logUFC/mL)		Survival
		0hours	3 hours
6702	Lactobacillus fermentum_6702	6.47712	5.97159	92.195
6710	Lactobacillus paracasei_6710	6.5721	6.27875	95.5365
6714	Lactobacillus paracasei._6714	5.68723	4.55226	80.0436
6713	Lactobacillus paracasei._6713	5.99123	5.27107	87.9798
6711	Lactobacillus paracasei._6711	7.63178	6.48667	84.9954
	Lactobacillus paracasei._6712	6.79239	5.71321	84.1119
	Lactobacillus paracasei_6715	5.9762	5.60566	93.7999
	Lactobacillus fermentum 6704	6.58734	5.93112	90.0382
	Lactobacillus paracasei_6709	6.5563	2.94776	44.9607
	Lactobacillus parafarraginis_ 6717	6.66901	5.7659	86.4586
	Lactobacillus parafarraginis_ 6719	7.64015	7.61976	99.7335
	Weissella ghanensis _6706	5.64015	4.37123	77.5536

## Sheet: bile
EXPERIMENTAL RESULTS
Bacteria	Treatment	Repetition	Bacterial load (UFC/mL)	Bacterial load (LogUFC/mL)	Survival (%)	ED	IC	Average	REPORT
6702 L. fermentum	Control	1	285000000	8.45484		6.03809	6.83261	78.2709	78±7
		2	190000000	8.27875
		3	200000000	8.30103
	Bile 0,25%	1	7800000	6.89209	81.5165
		2	800000	5.90309	71.3041
		3	6400000	6.80618	81.992
6704 L. fermentum	Control	1	2550000000	9.40654		3.17649	3.59447	78.32	78±4
		2	885000000	8.94694
		3	16850000000	10.2266
	Bile 0,25%	1	51500000	7.71181	81.9835
		2	7200000	6.85733	76.6444
		3	64000000	7.80618	76.3321
6705 Fructobacillus tropaeoli	Control	1	350000000	8.54407		6.14025	6.94822	81.1468	81±7
		2	270000000	8.43136
		3	75000000	7.87506
	Bile 0,25%	1	8650000	6.93702	81.191
		2	2100000	6.32222	74.9845
		3	7450000	6.87216	87.2648
6710 L. paracasei	Control	1	410000000	8.61278		8.06405	9.12517	60.9336	61±9
		2	1650000000	9.21748
		3	4100000000	9.61278
	Bile 0,25%	1	1100000	6.04139	70.1445
		2	200000	5.30103	57.5106
		3	200000	5.30103	55.1456
6715 L. paracasei	Control	1	2500000000	9.39794		4.31383	4.88147	74.0296	74±5
		2	3400000000	9.53148
		3	5750000000	9.75967
	Bile 0,25%	1	3650000	6.56229	69.8269
		2	30000000	7.47712	78.4466
		3	16000000	7.20412	73.8152
6717 L. parafarraginis.	Control	1	770000000	8.88649		0.439476	0.497305	85.8899	85,9±0,4
		2	720000000	8.85733
		3	810000000	8.90849
	Bile 0,25%	1	43000000	7.63347	85.8997
		2	37000000	7.5682	85.4456
		3	49000000	7.6902	86.3244
6719 L. parafarraginis.	Control	1	1000000000	9		0.804519	0.910382	88.2629	88,3±0,8
		2	1100000000	9.04139
		3	1200000000	9.07918
	Bile 0,25%	1	76000000	7.88081	87.5646
		2	92000000	7.96379	88.0814
		3	124000000	8.09342	89.1426

## Sheet: Lysozyme test
EXPERIMENTAL RESULTS
Bacterium	Treatment	Time (min)	Repetition	Bacterial load (UFC/mL)	Bacterial load (LogUFC/mL)	Survival (%)
6702L. fermentum	Control	0	1	360000000	8.5563			SUMMARY TABLE
		30	1	595000000	8.77452			Bacterium	Time (min)	ED	IC (95%)	Average	Survival (%)
		120	1	280000000	8.44716			6702	30	3.64927	4.12946	101.171	101±4
		120	2	168500000	8.2266				120	1.61755	1.8304	98.6354	99±2
		120	3	325000000	8.51188			6714	30	3.59953	4.07317	98.0887	98±4
	Lysozyme	0	1	285000000	8.45484				120	4.62414	5.23261	98.9185	99±5
		30	1	695000000	8.84198	104.579		6710	30	0.556333	0.629538	100.907	100,9±0,6
		120	1	280000000	8.44716	99.9091			120	1.09413	1.2381	100.22	100±1
		0	2	270000000	8.43136			6706	30	4.44166	5.02612	102.388	102±5
		30	2	160500000	8.20548	97.3209			120	2.59633	2.93797	97.711	98±3
		120	2	145500000	8.16286	96.8155		6707	30	1.99816	2.26109	99.5289	100±2
		0	3	220000000	8.34242				120	2.56845	2.90642	104.309	104±3
		30	3	300000000	8.47712	101.615		6704	30	0.519363	0.587703	99.8432	99,8±0,6
		120	3	188000000	8.27416	99.1817			120	2.69386	3.04834	100.534	101±3
6714 L. paracasei	Control	120	1	175000000	8.24304			6709	30	1.80991	2.04807	100.082	100±2
		120	2	165000000	8.21748				120	0.60084	0.679902	99.4478	99,4±0,7
		120	3	255000000	8.40654			6705	30	0.768636	0.869778	99.2901	99,3±0,9
	Lysozyme	0	1	485000000	8.68574				120	1.14921	1.30043	99.7096	100±1
		30	1	145000000	8.16137	93.9628		6712	30	1.49369	1.69024	100.31	100±2
		120	1	135000000	8.13033	93.6055			120	4.87049	5.51138	104.071	104±6
		0	2	190000000	8.27875			6715	30	4.67803	5.29359	96.934	97±5
		30	2	180000000	8.25527	99.7164			120	2.97477	3.36621	95.9364	96±3
		120	2	235000000	8.37107	101.115		6711	30	0.134619	0.152333	100.837	100,8±0,2
		0	3	170000000	8.23045				120	0.0173632	0.0196479	98.7834	98,78±0,02
		30	3	190000000	8.27875	100.587		6713	30	0.977952	1.10664	100.362	100±1
		120	3	250000000	8.39794	102.035			120	0.865262	0.979118	98.8663	99±1
6710L. paracasei	Control	120	1	72500000	7.86034			6717	30	0.136407	0.154356	77.4903	77,5±0,1
		120	2	92000000	7.96379				120	0.15545	0.175905	75.7821	75,8±0,2
		120	3	91500000	7.96142			6717	30	0.180937	0.204745	97.15	97,2±0,2
	Lysozyme	0	1	59500000	7.77452				120	0.265194	0.30009	88.6821	88,7±0,3
		30	1	78500000	7.89487	101.548
		120	1	57500000	7.75967	99.809
		0	2	130000000	8.11394
		30	2	146000000	8.16435	100.621
		120	2	116000000	8.06446	99.3901
		0	3	80500000	7.9058
		30	3	89000000	7.94939	100.551
		120	3	105000000	8.02119	101.46
6706Weissella	Control	120	1	3000000	6.47712
		120	2	1550000	6.19033		*
		120	3	2000000	6.30103
	Lysozyme	0	1	11800000	7.07188
		30	1	3950000	6.5966	101.845
		120	1	1400000	6.14613	94.8898
		0	2	5300000	6.72428
		30	2	4250000	6.62839	107.076
		120	2	1550000	6.19033	100
		0	3	7100000	6.85126
		30	3	1550000	6.19033	98.2432
		120	3	1550000	6.19033	98.2432
6707Lactobacillus spicheri	Control	120	1	110000	5.04139
		120	2	80000	4.90309		*
		120	3	225000	5.35218
	Lysozyme	0	1	51000000	7.70757
		30	1	34000000	7.53148	97.7153
		120	1	255000	5.40654	107.243
		0	2	42000000	7.62325
		30	2	36500000	7.56229	99.2004
		120	2	115000	5.0607	103.214
		0	3	30000000	7.47712
		30	3	40000000	7.60206	101.671
		120	3	305000	5.4843	102.468
6704L. fermentum	Control	120	1	145500000	8.16286
		120	2	121000000	8.08279
		120	3	314000000	8.49693
	Lysozyme	0	1	190000000	8.27875
		30	1	178500000	8.25164	99.6725
		120	1	375500000	8.57461	103.574
		0	2	185000000	8.26717
		30	2	166000000	8.22011	99.4307
		120	2	171000000	8.233	99.5866
		0	3	354000000	8.549
		30	3	385000000	8.58546	100.426
		120	3	260500000	8.41581	98.442
6709L. paracasei	Control	120	1	103000000	8.01284
		120	2	99500000	7.99782
		120	3	233000000	8.36736
	Lysozyme	0	1	189500000	8.27761
		30	1	148500000	8.17173	98.7209
		120	1	157500000	8.19728	99.0296
		0	2	117000000	8.06819
		30	2	174000000	8.24055	102.136
		120	2	120000000	8.07918	100.136
		0	3	264500000	8.42243
		30	3	235000000	8.37107	99.3902
		120	3	225500000	8.35315	99.1774
6705Fructobacillus tropaeoli	Control	120	1	135000000	8.13033
		120	2	135000000	8.13033
		120	3	205000000	8.31175
	Lysozyme	0	1	160000000	8.20412
		30	1	165000000	8.21748	100.163
		120	1	135000000	8.13033	99.1006
		0	2	145000000	8.16137
		30	2	120000000	8.07918	98.993
		120	2	120000000	8.07918	98.993
		0	3	140000000	8.14613
		30	3	110000000	8.04139	98.7143
		120	3	170000000	8.23045	101.035
6712L. paracasei	Control	120	1	275000000	8.43933
		120	2	295000000	8.46982
		120	3	285000000	8.45484
	Lysozyme	0	1	160000000	8.20412
		30	1	138500000	8.14145	99.2361
		120	1	125000000	8.09691	98.6932
		0	2	145000000	8.16137
		30	2	136500000	8.13513	99.6785
		120	2	395000000	8.5966	105.333
		0	3	127000000	8.1038
		30	3	185000000	8.26717	102.016
		120	3	585000000	8.76716	108.186
6715L. paracasei	Control	120	1	77500000	7.8893
		120	2	6450000	6.80956
		120	3	53000000	7.72428
	Lysozyme	0	1	145000000	8.16137
		30	1	120000000	8.07918	98.993
		120	1	90000000	7.95424	97.4621
		0	2	380000000	8.57978
		30	2	72000000	7.85733	91.5796
		120	2	86500000	7.93702	92.5083
		0	3	115000000	8.0607
		30	3	120000000	8.07918	100.229
		120	3	77000000	7.88649	97.8388
6711L. paracasei	Control	120	1	130000000	8.11394
		120	2	64000000	7.80618
		120	3	93000000	7.96848
	Lysozyme	0	1	115000000	8.0607
		30	1	135000000	8.13033	100.864
		120	1	92000000	7.96379	98.7977
		0	2	110000000	8.04139
		30	2	125000000	8.09691	100.69
		120	2	87500000	7.94201	98.7641
		0	3	59000000	7.77085
		30	3	70000000	7.8451	100.955
		120	3	47500000	7.67669	98.7883
6713L. paracasei	Control	120	1	110000000	8.04139
		120	2	130000000	8.11394
		120	3	105000000	8.02119
	Lysozyme	0	1	145000000	8.16137
		30	1	190000000	8.27875	101.438
		120	1	100000000	8	98.0228
		0	2	175000000	8.24304
		30	2	160000000	8.20412	99.5279
		120	2	140000000	8.14613	98.8243
		0	3	90000000	7.95424
		30	3	92000000	7.96379	100.12
		120	3	86000000	7.9345	99.7518
6717L. parafarraginis	Control	0	1	52000000	7.716
		30	1	60000000	7.77815
		120	1	150000000	8.17609
		120	2	149000000	8.17319
		120	3	144000000	8.15836
	Lysozyme	0	1	320000000	8.50515
		30	1	4000000	6.60206	77.6243
		120	1	2700000	6.43136	75.6173
		0	2	320000000	8.50515
		30	2	3900000	6.59106	77.495
		120	2	2800000	6.44716	75.803
		0	3	310000000	8.49136
		30	3	3700000	6.5682	77.3516
		120	3	2800000	6.44716	75.9261
6719L. parafarraginis	Control	0	1	62000000	7.79239
		30	1	67000000	7.82607
		120	1	100000000	8
		120	2	110000000	8.04139
		120	3	99000000	7.99564
	Lysozyme	0	1	66000000	7.81954
		30	1	39000000	7.59106	97.0781
		120	1	8600000	6.9345	88.6816
		0	2	66000000	7.81954
		30	2	41000000	7.61278	97.3559
		120	2	8200000	6.91381	88.4171
		0	3	65000000	7.81291
		30	3	38000000	7.57978	97.0161
		120	3	8900000	6.94939	88.9475
