# Supplementary material for: First characterization of the probiotic potential of lactic acid bacteria isolated from Costa Rican pineapple silages
Source: PeerJ. 2021 Nov 30;9:e12437. doi: 10.7717/peerj.12437 (PMC8641478; doi:10.7717/peerj.12437)
Supplement: Supplemental Information 10 [file peerj-09-12437-s010.xls]

## Sheet: Explanation
Antagonist activity (Table 3, raw data, Inhibition zones Salmonella and Listeria) Antimicrobial activity of the supernatant (Table 4, raw data, Salmonella and Listeria)

## Sheet: Inhibition zones Salmonella
Strain	Repetition	Halo (mm)	StandardDev	Mean	Confidence
L. fermentum 6702	1	5.1	0.2848	5.36667	0.322276
L. fermentum 6702	2	5.33333
L. fermentum 6702	3	5.66667
L. fermentum 6704	1	3.33333	0.440959	3.16667	0.498982
L. fermentum 6704	2	3.5
L. fermentum 6704	3	2.66667
F. tropaeoli 6705	1	8.6	1.03351	9.64444	1.16951
F. tropaeoli 6705	2	9.66667
F. tropaeoli 6705	3	10.6667
W. ghanensis 6706	1	8.83333	1.97569	8.46667	2.23566
W. ghanensis 6706	2	10.2333
W. ghanensis 6706	3	6.33333
L. spicheri 6707	1	9.56667	2.68356	6.52222	3.03668
L. spicheri 6707	2	5.5
L. spicheri 6707	3	4.5
L. casei 6709	1	8.76667	2.52902	5.97778	2.8618
L. casei 6709	2	5.33333
L. casei 6709	3	3.83333
L. paracasei 6710	1	9	2.59451	6.27778	2.93591
L. paracasei 6710	2	6
L. paracasei 6710	3	3.83333
L. paracasei 6711	1	10.4333	2.41937	7.7	2.73772
L. paracasei 6711	2	5.83333
L. paracasei 6711	3	6.83333
L. paracasei 6712	1	14	3.44131	10.0556	3.89413
L. paracasei 6712	2	8.5
L. paracasei 6712	3	7.66667
L. casei 6713	1	12.4333	3.91668	8.25556	4.43206
L. casei 6713	2	4.66667
L. casei 6713	3	7.66667
L. paracasei 6714	1	14	2.44002	11.3889	2.76109
L. paracasei 6714	2	9.16667
L. paracasei 6714	3	11
L. parafarraginis 6717	1	11.5	3.5914	8.72222	4.06398
L. parafarraginis 6717	2	10
L. parafarraginis 6717	3	4.66667
L. parafarraginis 6719	1	9.8	2.67921	7.37778	3.03175
L. parafarraginis 6719	2	7.83333
L. parafarraginis 6719	3	4.5
L. casei 6715	1	2.83333	0.428607	2.34444	0.485005
L. casei 6715	2	2.16667
L. casei 6715	3	2.03333

## Sheet: Inhibition zone Listeria
Listeria
Strain	Repetition	Halo (mm)	StandardDev	Mean	Confidence
L. fermentum 6702	1	2.33333	0.288675	2.16667	0.326661
L. fermentum 6702	2	2.33333
L. fermentum 6702	3	1.83333
L. fermentum 6704	1	3.83333	0.509175	3.38889	0.576175
L. fermentum 6704	2	3.5
L. fermentum 6704	3	2.83333
F. tropaeoli 6705	1	3.33333	0.7698	3.77778	0.871095
F. tropaeoli 6705	2	4.66667
F. tropaeoli 6705	3	3.33333
W. ghanensis 6706	1	5.16667	1	4.16667	1.13159
W. ghanensis 6706	2	4.16667
W. ghanensis 6706	3	3.16667
L. spicheri 6707	1	4.16667	0.787636	3.55556	0.891278
L. spicheri 6707	2	3.83333
L. spicheri 6707	3	2.66667
L. casei 6709	1	2.93333	0.51783	3.08889	0.585969
L. casei 6709	2	3.66667
L. casei 6709	3	2.66667
L. paracasei 6710	1	5.16667	0.666667	4.5	0.75439
L. paracasei 6710	2	4.5
L. paracasei 6710	3	3.83333
L. paracasei 6711	1	2.33333	0.288675	2.16667	0.326661
L. paracasei 6711	2	2.33333
L. paracasei 6711	3	1.83333
L. paracasei 6712	1	5.66667	0.176383	5.53333	0.199593
L. paracasei 6712	2	5.33333
L. paracasei 6712	3	5.6
L. casei 6713	1	4	0.673575	4.72222	0.762208
L. casei 6713	2	5.33333
L. casei 6713	3	4.83333
L. paracasei 6714	1	8.16667	0.787636	7.27778	0.891278
L. paracasei 6714	2	7
L. paracasei 6714	3	6.66667
L. parafarraginis 6717	1	5.33333	0.096225	5.38889	0.108887
L. parafarraginis 6717	2	5.5
L. parafarraginis 6717	3	5.33333
L. parafarraginis 6719	1	2.5	0.440959	2	0.498982
L. parafarraginis 6719	2	1.83333
L. parafarraginis 6719	3	1.66667
L. casei 6715	1	2.66667	0.288675	3	0.326661
L. casei 6715	2	3.16667
L. casei 6715	3	3.16667
Booth, S. J., Johnson, J. L., & Wilkins, T. D. (1977). Bacteriocin production by strains of Bacteroides isolated from human feces and the role of these strains in the bacterial ecology of the colon. Antimicrobial Agents and Chemotherapy, 11(4), 718–724.
Hütt, P., Shchepetova, J., Lõivukene, K., Kullisaar, T., & Mikelsaar, M. (2006). Antagonistic activity of probiotic lactobacilli and bifidobacteria against entero- and uropathogens. Journal of Applied Microbiology, 100(6), 1324–1332.
Soleimani, N. A., Kermanshahi, R. K., Yakhchali, B., & Sattari, T. N. (2010). Antagonistic activity of probiotic lactobacilli against Staphylococcus aureus isolated from bovine mastitis. African Journal of Microbiology Research, 4(20), 2169–2173.
												Hay diferencias significativas entre las cepas. La cepa más efectiva el L. casei 6714.

## Sheet: Salmonella
Software Version	2.07.17
Experiment File Path:	C:\Users\Public\Documents\Experiments\Jannette\salmonella t1 21-03-2019.xpt
Protocol File Path:	C:\Users\personal\Documents\Luis Enrique\janet.prt
Plate Number	Plate 1
Date	2019-03-21
Time	1899-12-31 09:40:50
Reader Type:	Epoch
Reader Serial Number:	150414C
Reading Type	Reader
Procedure Details
Plate Type	96 WELL PLATE
Eject plate on completion
Read	Absorbance Endpoint
	Full Plate
	Wavelengths: 620, 690
	Read Speed: Normal, Delay: 100 msec, Measurements/Data Point: 8
Results
Actual Temperature:	0
Actual Temperature:	0
		Control MRS			1			2			3
		1	2	3	4	5	6	7	8	9	10	11	12
	A	0.574	0.42	0.464	0.238	0.268	0.294	0.234	0.229	0.248	0.178	0.221	0.188	620
		0.505	0.417	0.449	0.248	0.283	0.301	0.246	0.236	0.251	0.196	0.218	0.191	690
	B	0.267	0.386	0.305	0.382	0.318	0.343	0.351	0.402	0.384	0.393	0.37	0.394	620
		0.29	0.371	0.306	0.372	0.316	0.341	0.347	0.392	0.379	0.386	0.355	0.377	690
	C	0.168	0.182	0.192	0.184	0.184	0.167	0.18	0.182	0.184	0.292	0.157	0.127	620
		0.192	0.208	0.218	0.211	0.223	0.194	0.207	0.209	0.21	0.3	0.18	0.139	690
	D	0.17	0.174	0.175	0.19	0.19	0.19	0.187	0.187	0.182	0.163	0.132	0.145	620
		0.186	0.195	0.202	0.207	0.209	0.212	0.209	0.204	0.201	0.183	0.144	0.13	690
	E	0.206	0.261	0.278	0.19	0.197	0.19	0.083	0.083	0.084	0.084	0.087	0.078	620
		0.302	0.343	0.29	0.209	0.218	0.21	0.082	0.081	0.083	0.082	0.085	0.078	690
	F	0.138	0.137	0.153	0.149	0.155	0.142	0.079	0.086	0.084	0.083	0.084	0.079	620
		0.147	0.147	0.166	0.163	0.168	0.155	0.077	0.084	0.082	0.082	0.082	0.079	690
	G	0.084	0.083	0.082	0.083	0.082	0.086	0.088	0.085	0.084	0.084	0.09	0.085	620
		0.081	0.08	0.08	0.08	0.08	0.084	0.087	0.081	0.081	0.083	0.09	0.083	690
	H	0.084	0.084	0.085	0.083	0.087	0.085	0.089	0.089	0.082	0.086	0.084	0.084	620
		0.081	0.082	0.082	0.083	0.083	0.083	0.085	0.085	0.082	0.082	0.084	0.082	690
																Sample
		Dilution	Sample	Blank	Correction	Meean	Standard Deviation								Dilution	CTS	Supernatant	Inoculum	MRS	V total	Concentration (%)
¡		0	0.206	0.138	0.068	0.105667	0.0326241								CMRS	50	0	50	50	150	0
			0.261	0.137	0.124										0	50	50	50	0	150	33.3333
			0.278	0.153	0.125										1	50	45	50	5	150	30
		1	0.238	0.184	0.054	0.0883333	0.0366924								2	50	40	50	10	150	26.6667
			0.268	0.184	0.084										3	50	35	50	15	150	23.3333
			0.294	0.167	0.127										4	50	30	50	20	150	20
		2	0.18	0.234	0.054	0.055	0.008544								5	50	25	50	25	150	16.6667
			0.229	0.182	0.047										6	50	20	50	30	150	13.3333
			0.248	0.184	0.064										7	50	15	50	35	150	10
		3	0.178	0.292	0.114	0.0796667	0.0297714
			0.221	0.157	0.064
			0.188	0.127	0.061
		4	0.267	0.17	0.097	0.146333	0.0592143
			0.386	0.174	0.212
			0.305	0.175	0.13
		5	0.382	0.19	0.192	0.157667	0.0322542
			0.318	0.19	0.128
			0.343	0.19	0.153
		6	0.351	0.187	0.164	0.193667	0.0265016
			0.402	0.187	0.215
			0.384	0.182	0.202
		7	0.393	0.163	0.23	0.239	0.00953939
			0.37	0.132	0.238
			0.394	0.145	0.249
		C MRS	0.574	0.138	0.436	0.343333	0.0814637
			0.42	0.137	0.283
			0.464	0.153	0.311
		CpH	0.19	0.149	0.041	0.0436667	0.00378594
			0.197	0.155	0.042
			0.19	0.142	0.048

## Sheet: Listeria
Software Version	2.07.17
Experiment File Path:	C:\Users\Public\Documents\Experiments\Jannette\CMI listeria21022019.xpt
Protocol File Path:	C:\Users\personal\Documents\Luis Enrique\janet.prt
Plate Number	Plate 1
Date	2019-02-21
Time	1899-12-31 07:45:23
Reader Type:	Epoch
Reader Serial Number:	150414C
Reading Type	Reader
Procedure Details
Plate Type	96 WELL PLATE
Eject plate on completion
Read	Absorbance Endpoint
	Full Plate
	Wavelengths: 620, 690
	Read Speed: Normal, Delay: 100 msec, Measurements/Data Point: 8
Results
Actual Temperature:	0
Actual Temperature:	0
		1	2	3	4	5	6	7	8	9	10	11	12
	A	0.128	0.139	0.245	0.22	0.262	0.267	0.254	0.256	0.248	0.249	0.26	0.25	620
		0.116	0.144	0.223	0.197	0.236	0.237	0.227	0.218	0.21	0.207	0.223	0.231	690
	B	0.279	0.232	0.183	0.242	0.249	0.25	0.256	0.247	0.246	0.243	0.233	0.257	620
		0.24	0.21	0.182	0.222	0.232	0.236	0.243	0.229	0.229	0.231	0.215	0.257	690
	C	0.113	0.126	0.145	0.12	0.127	0.123	0.124	0.125	0.124	0.117	0.108	0.105	620
		0.105	0.118	0.138	0.117	0.129	0.119	0.12	0.123	0.122	0.118	0.096	0.088	690
	D	0.121	0.122	0.127	0.127	0.141	0.134	0.127	0.121	0.114	0.108	0.112	0.11	620
		0.105	0.115	0.125	0.125	0.145	0.135	0.122	0.116	0.11	0.097	0.093	0.096	690
	E	0.141	0.151	0.159	0.285	0.273	0.273	0.083	0.084	0.084	0.085	0.084	0.08	620
		0.123	0.136	0.151	0.261	0.238	0.243	0.081	0.083	0.082	0.082	0.083	0.08	690
	F	0.116	0.129	0.139	0.126	0.128	0.123	0.085	0.083	0.088	0.084	0.084	0.078	620
		0.1	0.117	0.131	0.116	0.121	0.113	0.083	0.083	0.087	0.082	0.082	0.078	690
	G	0.085	0.086	0.085	0.084	0.083	0.084	0.083	0.086	0.084	0.084	0.081	0.085	620
		0.081	0.085	0.082	0.081	0.081	0.083	0.081	0.085	0.081	0.082	0.079	0.085	690		Sample
	H	0.082	0.089	0.085	0.086	0.083	0.085	0.084	0.084	0.085	0.074	0.086	0.086	620	Dilution	CTS	Supernatant	Inoculum	MRS	V total	Concentration (%)
		0.082	0.085	0.081	0.083	0.082	0.081	0.082	0.082	0.098	0.077	0.084	0.085	690	CMRS	50	0	50	50	150	0
															0	50	50	50	0	150	33.3333
															1	50	45	50	5	150	30
															2	50	40	50	10	150	26.6667
	Dilution	Sample	Blank	Correction	Mean										3	50	35	50	15	150	23.3333
	0	0.128	0.113	0.015	0.0426667										4	50	30	50	20	150	20
		0.139	0.126	0.013											5	50	25	50	25	150	16.6667
		0.245	0.145	0.1											6	50	20	50	30	150	13.3333
	1	0.22	0.12	0.1	0.126333										7	50	15	50	35	150	10
		0.262	0.127	0.135
		0.267	0.123	0.144
	2	0.254	0.124	0.13	0.128333
		0.256	0.125	0.131
		0.248	0.124	0.124
	3	0.249	0.117	0.132	0.143
		0.26	0.108	0.152
		0.25	0.105	0.145
	4	0.279	0.121	0.158	0.108
		0.232	0.122	0.11
		0.183	0.127	0.056
	5	0.242	0.127	0.115	0.113
		0.249	0.141	0.108
		0.25	0.134	0.116
	6	0.256	0.127	0.129	0.129
		0.247	0.121	0.126
		0.246	0.114	0.132
	7	0.243	0.108	0.135	0.134333
		0.233	0.112	0.121
		0.257	0.11	0.147
	Control negativo	0.141	0.116	0.025	0.0223333
		0.151	0.129	0.022
		0.159	0.139	0.02
	Control positivo	0.285	0.126	0.159	0.151333
		0.273	0.128	0.145
		0.273	0.123	0.15
