# Supplementary material for: First characterization of the probiotic potential of lactic acid bacteria isolated from Costa Rican pineapple silages
Source: PeerJ. 2021 Nov 30;9:e12437. doi: 10.7717/peerj.12437 (PMC8641478; doi:10.7717/peerj.12437)
Supplement: Supplemental Information 11 [file peerj-09-12437-s011.xls]

## Sheet: Explantation
Antibiotic resistance (Table 5, raw data)

## Sheet: Hoja1
antibiotics	Concentration	Halo (cm)	(mm)				Summary	Halo	Results
Ciprofloxacin	15 ug	0.6	6	5.33333	Average		Ciprofloxacin	5.33333	R
		0.5	5	0.57735	DS		Vancomycin	0	R
		0.5	5				Penicillin	11	R
Vancomycin	30ug	0	0	0			Amoxycilin with clavulanic acid	15	I
		0	0	0			Eritromycin	15.1667	I
		0	0				Amikacin	6	R
Penicillin	10 IU	1.1	11	11			Streptomycin	3.66667	R
		1.2	12	1			Tetracycline	8.83333	R
		1	10				Chloramphenicol	10.3333	R
Amoxycilin with clavulanic acid	30ug	1.45	14.5	15
		1.55	15.5	0.5
		1.5	15				Interpretation
Eritromycin	15ug	1.5	15	15.1667			<14	Resistant	R
		1.55	15.5	0.288675			15-19	Intermedate	I
		1.5	15				>20	Susceptible	S
Amikacin	30ug	0.6	6	6
		0.6	6	0
		0.6	6
Streptomycin	10ug	0.4	4	3.66667			Methodology notes: the inoculation was made with a 24-hour MRS bacteria broth.
		0.4	4	0.57735
		0.3	3
Tetracycline	30ug	0.8	8	8.83333
		1	10	1.04083
		0.85	8.5
Chloramphenicol	30ug	1	10	10.3333
		1.1	11	0.57735
		1	10
