# Supplementary material for: First characterization of the probiotic potential of lactic acid bacteria isolated from Costa Rican pineapple silages
Source: PeerJ. 2021 Nov 30;9:e12437. doi: 10.7717/peerj.12437 (PMC8641478; doi:10.7717/peerj.12437)
Supplement: Supplemental Information 12 [file peerj-09-12437-s012.xls]

## Sheet: Explanation
Adhesion (Table 6, raw data adhesion) Cell Culture Assays (Table 7, raw data treatment and prevention)

## Sheet: Adhesion
Sample/optical camp	1	2	3	4	5	Mean
Control (PBS)	28	26	28	29	31	28.4
Control (PBS)	27	25	27	25	22	25.2
Control (PBS)	29	28	30	29	27	28.6
Cell1	31	30	26	32	31	30
Cell2	26	23	30	28	27	26.8
Cell 3	22	24	23	26	23	23.6
6714	443	389	320	408	398	391.6
6714	464	396	495	387	379	424.2
6714	455	382	408	377	350	394.4
Cell1	21	22	23	30	20	23.2
Cell2	25	27	22	27	25	25.2
Cell3	28	20	24	31		25.75
6702	146	164	143	184	112	149.8
6702	163	190	183	188	182	181.2
6702	187	134	186	142	162	162.2
	Sample	Bacteria per cell		Sample	Bacteria per cell
	Control	0		Control	0
	6714	391.6		6702	149.8
	6714	424.2		6702	181.2
	6714	394.4		6702	162.2
	Standard deviation	18.0677		Standard deviation	15.8152

## Sheet: Treatment
	Raw data 2308 1/2									Mean
	MOI 1000
Dilution	1	10	100	1000	10000	100000		Dilution	1	10	100	1000	10000	100000
Repetition								Repetition
Control	inc	inc	inc	16	4	1		Control	#DIV/0!	#DIV/0!	#DIV/0!	14	3.5	1
	inc	inc	inc	12	3	1		1	#DIV/0!	#DIV/0!	#DIV/0!	3.5	1	#DIV/0!
1	inc	inc	inc	5	1			2	#DIV/0!	#DIV/0!	#DIV/0!	6.5	1.5	#DIV/0!
	inc	inc	inc	2	1			3	#DIV/0!	#DIV/0!	#DIV/0!	6	1.5	#DIV/0!
2	inc	inc	inc	7	2
	inc	inc	inc	6	1
3	inc	inc	inc	7	1
	inc	inc	inc	5	2					UFC/ml
								dilution	1	10	100	1000	10000	100000
								Repetition
								Control	#DIV/0!	#DIV/0!	#DIV/0!	233333	583333	1.66667e+06
								1	#DIV/0!	#DIV/0!	#DIV/0!	58333.3	166667	#DIV/0!
								2	#DIV/0!	#DIV/0!	#DIV/0!	108333	250000	#DIV/0!
								3	#DIV/0!	#DIV/0!	#DIV/0!	100000	250000	#DIV/0!

## Sheet: Prevention
	Raw data 2308 1/2									Mean
	MOI 1000
Dilution	1	10	100	1000	10000	100000		Dilution	1	10	100	1000	10000	100000
Repetition								Repetition
Control	inc	inc	inc	29	3	1		Control	#DIV/0!	#DIV/0!	#DIV/0!	29.5	2.5	1
	inc	inc	inc	30	2	1		1	#DIV/0!	#DIV/0!	#DIV/0!	14.5	2	#DIV/0!
1	inc	inc	inc	15	3			2	#DIV/0!	#DIV/0!	#DIV/0!	6.5	1	#DIV/0!
	inc	inc	inc	14	1			3	#DIV/0!	#DIV/0!	#DIV/0!	11.5	1.5	#DIV/0!
2	inc	inc	inc	5	1
	inc	inc	inc	8	1
3	inc	inc	inc	12	1
	inc	inc	inc	11	2					UFC/ml
								Dilution	1	10	100	1000	10000	100000
								Repetition
								Control	#DIV/0!	#DIV/0!	#DIV/0!	491667	416667	1.66667e+06
								1	#DIV/0!	#DIV/0!	#DIV/0!	241667	333333	#DIV/0!
								2	#DIV/0!	#DIV/0!	#DIV/0!	108333	166667	#DIV/0!
								3	#DIV/0!	#DIV/0!	#DIV/0!	191667	250000	#DIV/0!

## Sheet: Resume
Sample		Count	LogUFC/mL	Standard deviation
	Control	1.66667e+06	6.22185
Treatment	1	166667	5.22185	0.101666
Treatment	2	250000	5.39794
Treatment	3	250000	5.39794
Prevention	1	333333	5.52288	0.151238
Prevention	2	166667	5.22185
Prevention	3	250000	5.39794
Sample	Bacteria per cell		Sample	Bacteria per cell
Control	0		Control	0
6714	391.6		6702	149.8
6714	424.2		6702	181.2
6714	394.4		6702	162.2
Standard deviation	18.0677		Standard deviation	15.8152
			6702
			6714
Control
